# Supplementary material
Source: Springer Nature journal article supplement (https://www.springermedizin.de/resource/supplementary/12885_2013_3875_MOESM3_ESM.pdf/9464650)

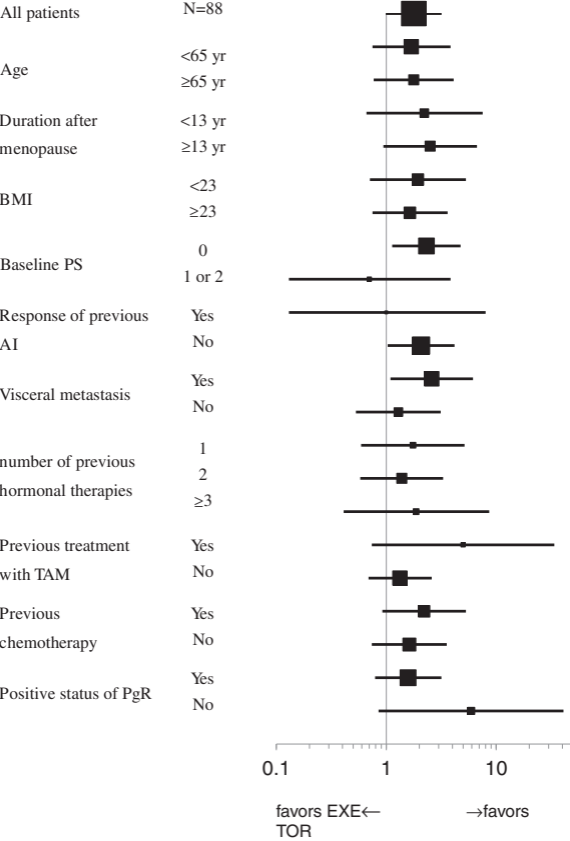

Supplement: MOESM3 [file 9464650]
